# Supplementary material for: Experimental Evaluation of a Coated Foam Catalytic Reactor for the Direct CO2-to-Methanol Synthesis Process
Source: MDPI journal article supplement (doi:10.3390/chemengineering7020016), 2023-02-21
Supplement: s1 [file s1]

Archive with 1 entries (1 files):
- ChemEngineering-2106255-supplementary.pdf
