# Supplementary material for: Experimental Evaluation of a Coated Foam Catalytic Reactor for the Direct CO2-to-Methanol Synthesis Process
Source: MDPI journal article supplement (doi:10.3390/chemengineering7020016), 2023-02-21
Supplement: s1 [file s1 › ChemEngineering-2106255-supplementary.pdf]

# Supplementary Materials

## Nomenclature

|                    |                                                       |
|--------------------|-------------------------------------------------------|
| $f$                | Fugacity, $\text{mol m}^{-3}$                         |
| $G$                | Gibbs free energy, $\text{J mol}^{-1}$                |
| $N_{ij}$           | Number of moles of component $i$ in reaction $j$      |
| $R_{\text{const}}$ | Ideal gas constant, $\text{J K}^{-1} \text{mol}^{-1}$ |
| $T$                | Temperature, K                                        |

## Greek symbols

|         |                                                           |
|---------|-----------------------------------------------------------|
| $\mu_i$ | Chemical potential of component $i$ , $\text{J mol}^{-1}$ |
|---------|-----------------------------------------------------------|

## Superscript

|      |                |
|------|----------------|
| $^o$ | Standard state |
|------|----------------|

## 1. Scanning electron microscopy–Energy dense X-Ray spectroscopy of the Cu/ZnO/Al<sub>2</sub>O<sub>3</sub> catalyst

SEM-EDS results confirmed the presence of Cu, Zn, Al and O in the catalyst. The SEM micrograph (Figure S1a) shows a catalyst consisting of a large number of isolated and agglomerated globular catalyst particles. The EDS maps (Figure S1b) show a very homogeneous distribution of Cu, Zn and Al in the catalyst, which is expected to result in beneficial interactions between well-mixed and uniformly spread nanoparticles, especially Cu and ZnO.

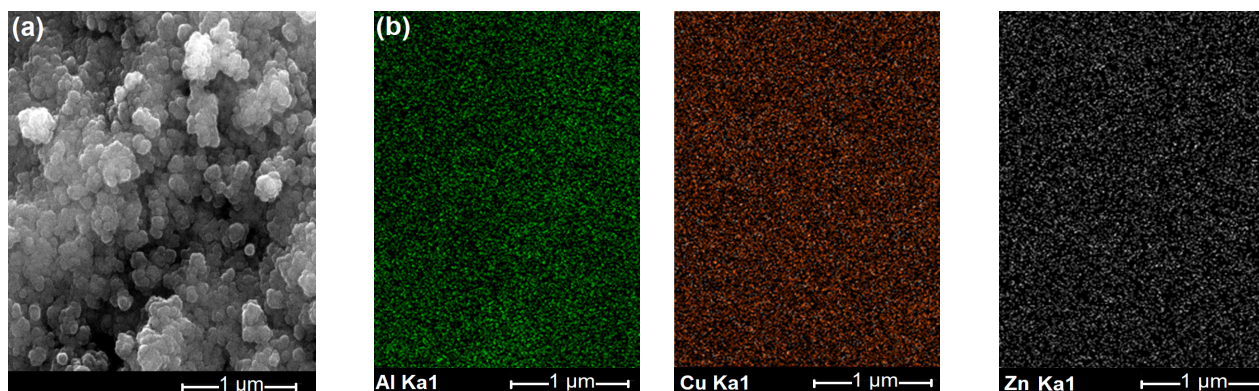

**Figure S1.** Commercial Cu/ZnO/Al<sub>2</sub>O<sub>3</sub> catalyst: (a) morphology displayed on the SEM micrograph and (b) EDS maps of elemental distribution: Al (green), Cu (red) and Zn (black).

## 2. N<sub>2</sub> adsorption/desorption profile of the Cu/ZnO/Al<sub>2</sub>O<sub>3</sub> catalyst

The N<sub>2</sub> adsorption/desorption profile of the catalyst corresponds to a Type IV isotherm with a H1 hysteresis loop, which is a characteristic of catalysts with a mesoporous structure [48].

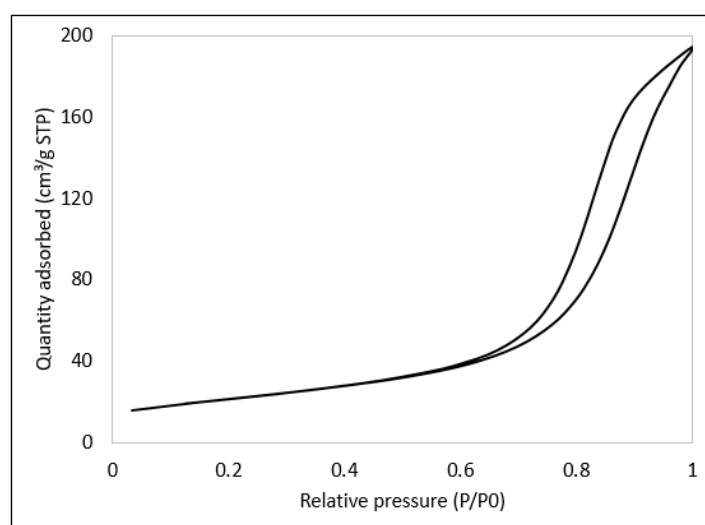

**Figure S2.** Isothermal ( $-196\text{ }^{\circ}\text{C}$ ) linear plot of the  $\text{N}_2$  adsorption/desorption on the  $\text{Cu/ZnO/Al}_2\text{O}_3$  catalyst.

### 3. X-ray diffractogram of the $\text{Cu/ZnO/Al}_2\text{O}_3$ catalyst

The XRD diffractogram of the catalyst (Fig S3) confirmed the presence of  $\text{CuO}$  and  $\text{ZnO}$ .  $\text{Al}_2\text{O}_3$  peaks were not visible, probably because of their low content or amorphous nature.

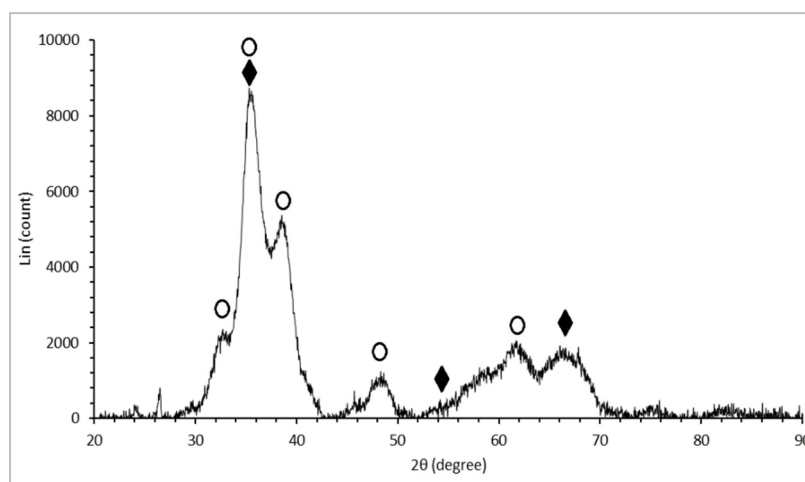

**Figure S3.** XRD diffractogram of the  $\text{Cu/ZnO/Al}_2\text{O}_3$  catalyst showing typical  $\text{CuO}$  (◆) and  $\text{ZnO}$  (○) peak positions as reported in the literature [14,18,39].

### 4. Transmission electron microscopy of the $\text{Cu/ZnO/Al}_2\text{O}_3$ catalyst

The TEM micrographs (Fig. S4) reveal that the catalyst components ( $\text{Cu}$ ,  $\text{ZnO}$  and  $\text{Al}_2\text{O}_3$ ) are hardly distinguishable. Furthermore, the fact that the particles are not well shaped can also denote a low level of crystallinity of the catalyst components [9], TEM micrographs suggest an intimate contact between  $\text{Cu}$  and  $\text{ZnO}$  particles. This has been reported to enhance the catalytic performance of  $\text{Cu/ZnO/Al}_2\text{O}_3$  [9,14].

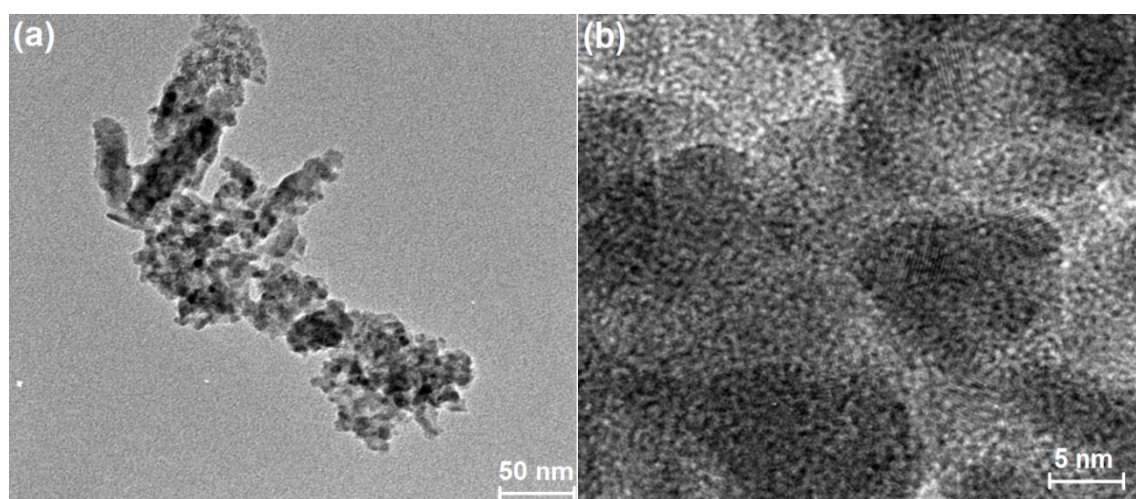

**Figure S4.** Cu/ZnO/Al<sub>2</sub>O<sub>3</sub> catalyst: (a) low-magnification and (b) high-magnification TEM micrographs.

### 5. Catalyst temperature programmed reduction profile

H<sub>2</sub> temperature programmed reduction profile (Fig. S5) was used for the determination of the Cu/ZnO/Al<sub>2</sub>O<sub>3</sub> catalyst reduction temperature. A reduction temperature of 230 °C was used in the reduction of the catalyst prior to experiments.

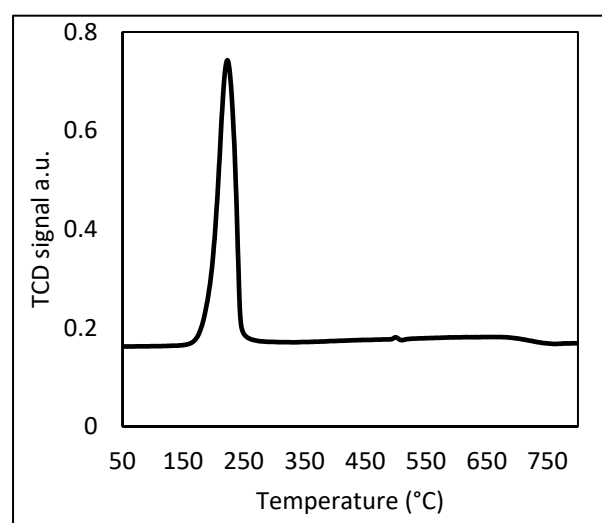

**Figure S5.** H<sub>2</sub>-TPR profile of the Cu/ZnO/Al<sub>2</sub>O<sub>3</sub> catalyst.

### 6. Equilibrium calculations

Equilibrium calculations were performed using ASPEN v8.6 Gibbs equilibrium reactor (RGibbs). In order to simulate the direct CO<sub>2</sub>-to-MeOH process, and generate the equilibrium CO<sub>2</sub> conversion and methanol selectivity curves, the feed composition was set to 75% H<sub>2</sub> and 25% CO<sub>2</sub>, and the products were set to include CO, H<sub>2</sub>O, the unreacted CO<sub>2</sub> and H<sub>2</sub>. The RGibbs works on the principle of Gibbs free energy minimisation, which is a non-stoichiometric method, assuming that a system of  $n$  components involved in  $r$  reactions is thermodynamically favoured when the change in Gibbs  $dG$  free energy is minimum [49,50].

$$dG = \sum_{i=1}^n \sum_{j=1}^r \mu_i dN_{ij} = 0.$$

In Eq. B1, the chemical potential  $\mu_i$  of component  $i$  is calculated by

$$\mu_i = R_{const} T \left[ G_i^0 + \ln \left( \frac{f_i}{f_i^0} \right) \right].$$

Neither methane nor other hydrocarbons were part of the product gas. Hence, the CO<sub>2</sub> hydrogenation to MeOH and reverse water gas shift were the only possible reactions in the system.
